# Supplementary material
Source: Springer Nature journal article supplement (https://www.springermedizin.de/resource/supplementary/12943_2009_548_MOESM7_ESM.pdf/9554946)

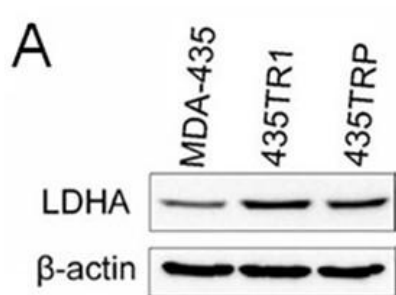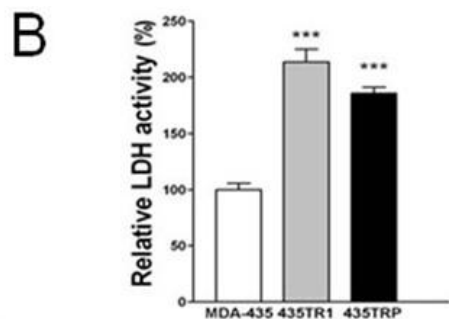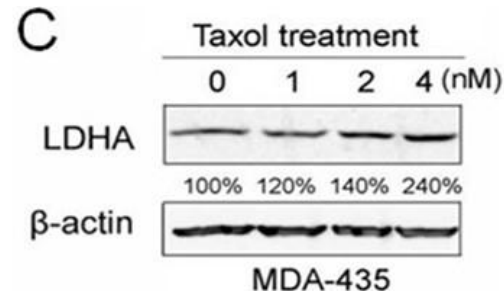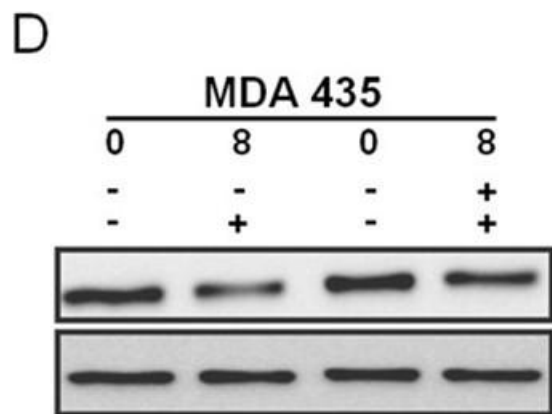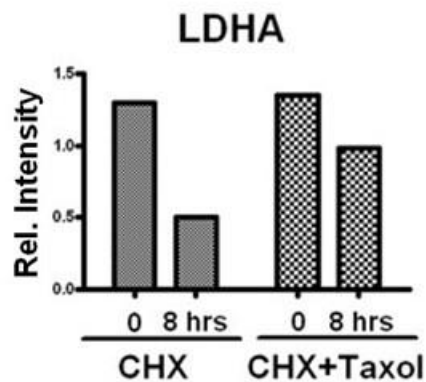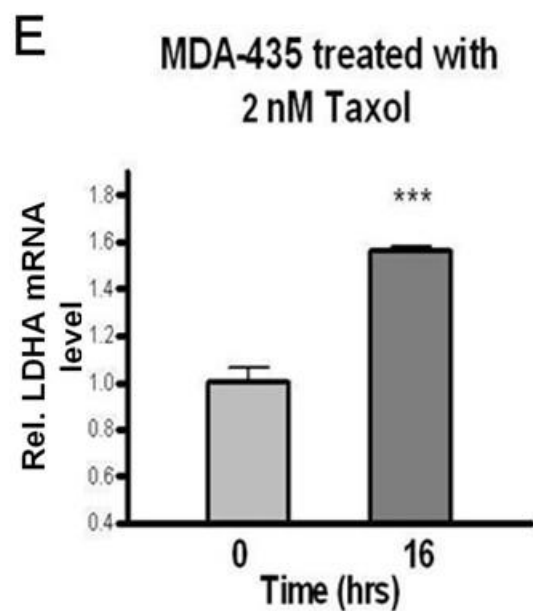

Supplement: MOESM7 [file 9554946]
